# Supplementary material for: Molecular characterization of a closterovirus from carrot and its identification as a German isolate of Carrot yellow leaf virus
Source: Springer Nature journal article supplement (doi:10.1007/s00705-009-0428-3), 2009-07-02
Supplement: 705_2009_428_MOESM1_ESM.pdf [file 705_2009_428_MOESM1_ESM.pdf]

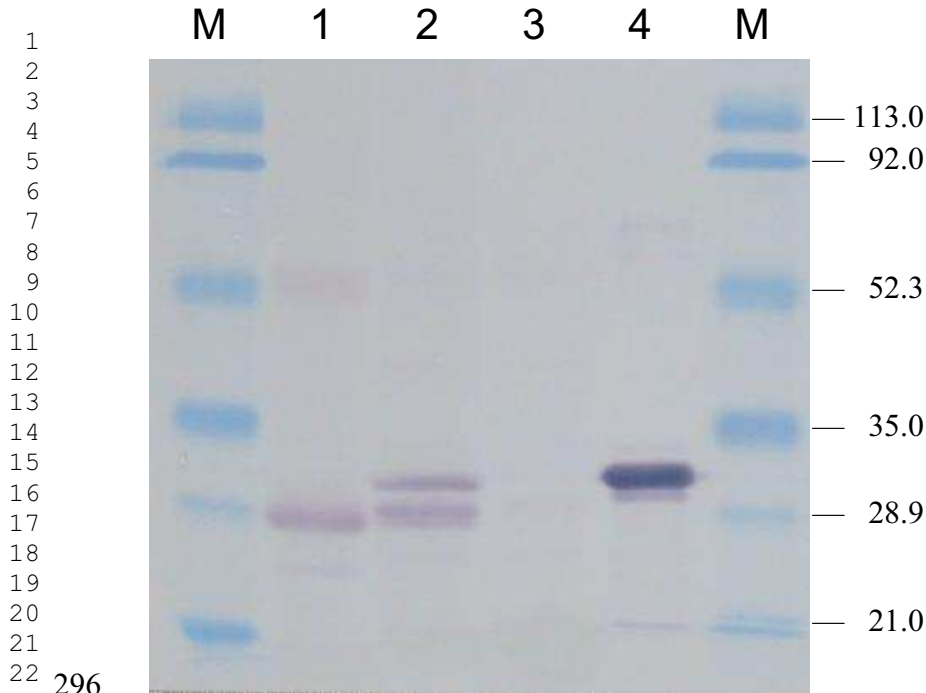

296

297

298

Supplementary figure.

299

Western blot reaction of alkaline phosphatase-labelled polyclonal antibodies to the expressed protein of CCV ORF7 (CP) with extracts from the reference sample of CYLV (DC119) from the Netherlands (lane 1), carrot leaves infected with a German CCV isolate from Frankenhausen (lane 2), non-infected carrot leaves (lane 3), and with the recombinant ORF7 protein (CP). Lanes M show the migration of the pre-stained marker proteins (Biorad), the approximate sizes of which are indicated on the right.

300

301

302

303

304
